# Supplementary material for: Hypernasality associated with basal ganglia dysfunction: evidence from Parkinson’s disease and Huntington’s disease
Source: PeerJ. 2016 Sep 29;4:e2530. doi: 10.7717/peerj.2530 (PMC5047145; doi:10.7717/peerj.2530)
Supplement: Supplemental Information 1 — Dataset containing acoustic and perceptual hypernasality scores and clinical informations related to investigated subjects. [file peerj-04-2530-s001.xlsx]

## Sheet: Raw Data
		Acoustic analysis			Perceptual analysis (0 = no, 1 = mild, 2 = moderate, 3 = severe) based on GOS.SP.ASS.’98 (Sell et al. 1999)											Clinical informations				PD				HD
	Names	EFN mean [dB]	EFN SD [dB]	EFN trend [dB/s]	Median of Raters	Rater 1	Rater 2	Rater 3	Rater 4	Rater 5	Rater 6	Rater 7	Rater 8	Rater 9	Rater 10	Age [years]	Gender	Disease Duration [years]	H&Y	UPDRS III	speech item 18	bradykinesia subscore	UHDRS	speech item	chorea subscore
	PN_01	-42.0159	2.23505	0.000973839	1	1	0	1	0	0	0	1	1	1	1	66	M	8	2	4	1	2	-	-	-
	PN_02	-42.5713	2.85152	0.000915198	1	1	2	1	1	0	0	2	1	1	1	65	M	9	2	15	1	8	-	-	-
	PN_03	-41.0662	2.86	0.000347056	1	1	1	0	1	1	1	2	2	0	0	62	M	6	2	6	1	2	-	-	-
	PN_04	-41.013	2.9726	-0.000195028	1	1	1	1	1	0	2	2	1	2	1	64	M	5	2	21	1	7	-	-	-
	PN_05	-38.0227	2.00852	-0.000221674	1	1	1	1	1	0	0	1	2	1	1	58	M	5	2	11	1	4	-	-	-
	PN_06	-41.9572	2.46697	0.00107572	1	1	1	0	1	0	1	2	1	2	1	80	M	6	2.5	33	1	17	-	-	-
	PN_07	-43.4794	2.13975	-0.000404092	1	0	1	1	0	0	1	1	2	1	1	66	M	8	2.5	23	1	10	-	-	-
	PN_08	-38.0079	2.33512	0.000904012	0	0	0	0	0	0	0	1	0	0	0	56	F	8	2.5	36	1	11	-	-	-
	PN_09	-32.0158	2.37117	1.46208e-05	0	0	0	0	0	0	0	0	1	0	0	41	F	4	2	16	1	6	-	-	-
	PN_10	-35.1624	1.06693	0.000252681	0	0	0	0	0	0	0	0	1	1	0	60	M	4	2	22	1	10	-	-	-
	PN_11	-39.2757	1.60584	0.000217785	0	0	0	0	0	0	0	0	0	0	0	45	M	5	2	28	1	11	-	-	-
	PN_12	-40.7251	2.40226	-0.00292453	1	1	1	1	1	0	1	2	2	1	1	58	M	6	2	27	1	9	-	-	-
	PN_13	-40.5311	2.38267	-0.000144659	0	0	0	0	0	0	0	1	1	1	0	64	M	7	2.5	30	0	16	-	-	-
	PN_14	-39.649	2.90204	-0.000400231	1	1	2	0	1	1	1	2	2	1	2	74	M	14	2.5	22	2	11	-	-	-
	PN_15	-41.0392	3.02861	0.00306305	2	2	2	2	2	2	2	2	2	1	2	77	M	7	2	14	1	8	-	-	-
	PN_16	-44.0168	3.45916	0.00112685	2	2	1	1	1	2	2	2	2	0	2	76	M	6	3	23	1	10	-	-	-
	PN_17	-40.8023	1.85206	-0.000711476	0	0	0	1	1	0	0	0	1	0	1	56	M	1	1	8	0	3	-	-	-
	PN_18	-32.2655	2.31496	0.00288851	1	0	1	1	1	0	0	1	1	1	0	55	M	20	2	14	1	7	-	-	-
	PN_19	-37.6444	2.61595	-0.00252457	0	0	0	0	0	0	0	1	0	0	1	68	M	9	1.5	12	0	7	-	-	-
	PN_20	-36.9563	1.13342	-0.000103093	0	0	0	0	0	1	0	0	1	1	0	64	F	12	1	6	1	3	-	-	-
	PN_21	-41.222	2.10913	-3.40542e-05	1	0	1	1	0	0	1	0	1	0	1	76	M	11	2	27	2	11	-	-	-
	PN_22	-34.5591	1.57273	0.000598249	1	1	1	1	0	0	0	0	2	1	0	61	F	14	2	16	0	9	-	-	-
	PN_23	-41.2104	2.18972	0.000761179	1	1	1	0	2	0	1	1	2	0	1	55	F	11	2	13	0	4	-	-	-
	PN_24	-34.1491	1.21555	0.000176454	0	1	1	0	0	0	0	0	0	0	0	48	F	7	1.5	9	0	4	-	-	-
	PN_25	-47.6104	2.79295	0.00030573	1	1	0	0	0	1	0	2	2	0	1	79	M	9	2.5	20	1	10	-	-	-
	PN_26	-32.4855	0.989075	-0.00012964	1	1	2	1	0	0	1	1	2	1	1	71	F	6	2.5	17	0	7	-	-	-
	PN_27	-39.1575	2.03495	0.000451939	1	0	1	0	1	0	1	1	1	1	0	58	F	9	2.5	10	1	4	-	-	-
	PN_28	-40.5975	2.38366	-0.00105678	1	1	1	1	0	1	1	2	1	0	1	55	F	3	1.5	6	0	3	-	-	-
	PN_29	-39.2355	3.28306	0.001381	1	1	1	1	0	1	1	1	1	0	1	66	M	11	2.5	21	2	9	-	-	-
	PN_30	-35.5708	1.07191	0.000529222	0	0	0	1	0	0	0	0	1	0	0	60	F	8	2	27	1	12	-	-	-
	PN_31	-33.1115	1.8506	-0.000808014	0	0	0	0	0	0	0	0	0	0	0	72	F	5	2.5	17	1	10	-	-	-
	PN_32	-27.7763	2.06689	0.00239086	1	1	1	1	0	0	1	1	2	2	0	69	F	3	2.5	19	1	8	-	-	-
	PN_33	-30.2814	1.1652	0.000416599	1	1	1	1	2	0	0	1	1	2	1	66	F	24	2	8	2	3	-	-	-
	PN_34	-34.1893	2.09592	0.00115416	1	1	1	1	2	1	1	2	2	0	2	80	M	15	2.5	26	1	11	-	-	-
	PN_35	-39.0762	2.04727	-2.15394e-05	1	0	1	1	1	1	1	2	1	0	0	56	M	6	2	9	0	6	-	-	-
	PN_36	-44.9643	2.6208	5.13147e-05	0	0	1	0	1	0	0	1	0	0	0	52	F	5	2.5	16	1	7	-	-	-
	PN_37	-41.0398	1.92451	0.000729461	0	0	0	0	0	0	0	1	2	1	0	68	F	4	2	14	0	7	-	-	-
	HD_01	-35.5271	4.51965	-0.00499173	1	1	1	1	2	1	0	2	2	1	1	66	F	16	-	-	-	-	30	1	7
	HD_02	-39.716	5.61688	-0.000205049	2	2	2	2	1	2	2	2	2	2	2	45	M	2	-	-	-	-	31	1	6
	HD_03	-37.5471	4.06613	-0.0010737	1	1	1	1	1	0	1	2	2	1	1	61	M	8	-	-	-	-	27	1	11
	HD_04	-35.7881	1.69949	-0.000687485	1	1	1	1	0	1	1	2	2	0	2	35	M	7	-	-	-	-	23	1	4
	HD_05	-40.8983	4.30636	-0.000574993	2	2	2	1	0	2	1	2	2	2	2	60	M	7	-	-	-	-	32	1	5
	HD_06	-28.1106	4.98468	0.0037985	1	0	1	1	1	0	1	2	2	0	2	49	M	6	-	-	-	-	32	1	13
	HD_07	-39.7893	2.27669	-0.00110557	1	2	1	1	1	1	2	2	2	1	1	54	M	6	-	-	-	-	33	1	13
	HD_08	-34.479	3.19764	0.00928186	1	2	1	1	1	1	1	1	1	1	2	31	F	3	-	-	-	-	31	1	7
	HD_09	-23.3514	5.14327	0.00403989	1	1	1	1	0	0	0	0	1	1	1	56	F	4	-	-	-	-	28	1	14
	HD_10	-39.4241	8.80633	0.000299859	2	1	2	2	2	0	1	2	2	0	2	38	M	11	-	-	-	-	54	1	9
	HD_11	-29.2181	4.57216	-0.000695803	1	0	1	0	0	1	0	1	1	0	1	38	M	10	-	-	-	-	34	1	12
	HD_12	-32.6848	2.41752	0.00015081	1	1	1	0	1	1	1	1	2	1	1	64	F	3	-	-	-	-	10	0	4
	HD_13	-27.3781	3.90701	0.00228837	0	0	1	0	0	0	0	0	0	0	0	59	F	4	-	-	-	-	21	0	9
	HD_14	-33.8105	2.60439	0.00360684	0	0	0	0	0	0	0	0	1	0	0	30	F	4	-	-	-	-	20	0	0
	HD_15	-32.4962	3.38373	-0.00111811	1	1	2	2	0	0	1	2	1	0	1	53	F	5	-	-	-	-	35	0	14
	HD_16	-42.2051	3.11544	0.00233165	1	1	1	2	1	1	0	1	2	0	1	42	M	3	-	-	-	-	16	1	6
	HD_17	-34.4413	5.81384	-0.0156378	1	1	1	1	1	1	0	2	2	1	1	35	F	5	-	-	-	-	29	1	12
	HD_18	-34.9838	1.96608	-0.000530184	1	0	1	1	1	0	0	1	1	0	1	23	M	9	-	-	-	-	3	0	0
	HD_19	-37.5158	2.25728	0.00070739	1	1	1	1	0	0	0	1	2	1	1	47	F	8	-	-	-	-	18	0	7
	HD_20	-40.9112	2.34892	0.000640339	1	1	1	1	1	1	2	2	1	1	2	35	M	7	-	-	-	-	34	1	9
	HD_21	-39.8012	1.9673	6.20823e-05	0	1	1	0	0	0	0	0	0	0	0	41	F	5	-	-	-	-	8	0	6
	HD_22	-37.8989	2.13585	-0.000215318	1	1	1	1	0	1	1	2	1	0	1	31	M	2	-	-	-	-	15	1	5
	HD_23	-29.7138	8.02043	-0.0125137	1	0	1	1	1	1	1	1	2	0	1	47	M	2	-	-	-	-	20	1	7
	HD_24	-27.1406	4.18273	0.0111767	2	1	2	1	1	0	1	2	2	2	2	47	F	6	-	-	-	-	37	1	12
	HD_25	-35.2358	3.38052	-0.0102145	1	0	1	1	1	0	1	1	1	0	0	51	M	2	-	-	-	-	12	1	6
	HD_26	-34.5653	9.56949	-0.000310694	2	2	2	1	2	1	2	2	2	1	2	67	F	5	-	-	-	-	-	-	-
	HD_27	-38.7854	3.84636	2.41845e-06	1	1	0	1	0	0	0	2	2	1	1	34	F	8	-	-	-	-	34	1	12
	HD_28	-37.4209	3.1285	-0.000985108	1	1	1	2	2	1	0	0	2	0	1	64	F	4	-	-	-	-	19	0	11
	HD_29	-36.8128	3.97921	0.000646012	1	2	1	1	1	1	1	0	2	2	2	60	M	3	-	-	-	-	42	1	12
	HD_30	-39.6038	5.01716	6.4642e-05	1	1	1	1	0	0	1	0	2	1	1	38	M	9	-	-	-	-	13	1	10
	HD_31	-29.2599	10.3746	0.00272351	2	1	2	2	1	0	0	2	2	0	2	64	F	5	-	-	-	-	36	1	14
	HD_32	-40.6485	3.95953	0.000158149	1	1	1	1	1	1	1	2	2	0	1	67	M	6	-	-	-	-	40	1	12
	HD_33	-33.3904	1.32041	0.000296531	1	0	1	1	0	0	0	1	2	1	1	48	F	1	-	-	-	-	26	1	6
	HD_34	-30.8658	4.89652	0.00981146	1	2	1	1	0	1	0	1	2	1	1	67	M	12	-	-	-	-	-	-	-
	HD_35	-31.7651	4.22159	-0.00264001	1	2	1	1	1	0	0	2	1	0	1	62	F	5	-	-	-	-	18	1	8
	HD_36	-34.7533	4.37637	0.00215569	1	1	2	1	1	1	1	2	2	1	2	47	F	13	-	-	-	-	24	1	11
	HD_37	-31.6367	7.2211	-0.00589811	0	0	1	0	0	0	0	1	1	0	0	59	M	8	-	-	-	-	13	1	10
	HC_01	-38.8182	1.57439	-4.034e-06	0	0	0	1	0	0	0	2	1	0	0	73	M	-	-	-	-	-	-	-	-
	HC_02	-36.7547	1.76813	-0.000930815	0	0	0	0	0	0	0	0	0	0	0	68	F	-	-	-	-	-	-	-	-
	HC_03	-43.4681	2.00135	-0.000180144	1	1	0	0	1	1	0	1	2	0	1	59	M	-	-	-	-	-	-	-	-
	HC_04	-39.0789	1.81658	-0.000736429	0	0	0	0	0	0	0	0	1	0	0	68	F	-	-	-	-	-	-	-	-
	HC_05	-37.3795	2.8709	0.00306351	0	0	0	0	0	0	0	1	0	0	0	77	M	-	-	-	-	-	-	-	-
	HC_06	-42.1386	1.80692	5.18113e-05	0	0	0	0	0	1	1	1	2	0	0	55	M	-	-	-	-	-	-	-	-
	HC_07	-43.905	2.11161	-0.000110393	0	0	0	0	0	0	0	0	1	0	0	50	F	-	-	-	-	-	-	-	-
	HC_08	-38.0513	1.75118	0.000214204	0	0	0	0	0	0	0	0	0	0	0	58	M	-	-	-	-	-	-	-	-
	HC_09	-42.767	2.27713	-0.000113045	0	0	1	1	0	0	0	2	0	0	0	61	M	-	-	-	-	-	-	-	-
	HC_10	-34.7595	2.02519	0.000356503	0	0	0	0	1	0	0	1	1	0	0	56	M	-	-	-	-	-	-	-	-
	HC_11	-38.1846	2.42137	0.000910447	1	1	0	1	1	1	0	1	1	1	2	65	M	-	-	-	-	-	-	-	-
	HC_12	-33.8067	1.48397	0.000237815	1	0	0	1	2	1	1	0	1	1	0	67	F	-	-	-	-	-	-	-	-
	HC_13	-32.1817	1.50206	-0.000153531	0	0	0	0	0	1	0	0	0	1	0	67	F	-	-	-	-	-	-	-	-
	HC_14	-39.2326	2.07835	0.000120465	0	0	0	0	0	0	0	0	2	0	0	66	M	-	-	-	-	-	-	-	-
	HC_15	-39.9905	2.02657	-0.000256428	0	0	0	0	0	0	0	0	0	0	0	74	F	-	-	-	-	-	-	-	-
	HC_16	-39.5563	2.03732	0.000574857	0	0	0	0	0	1	0	1	2	0	0	65	M	-	-	-	-	-	-	-	-
	HC_17	-40.4408	2.09838	1.73797e-05	0	0	0	1	1	0	0	1	0	0	0	56	M	-	-	-	-	-	-	-	-
	HC_18	-44.1221	2.40358	-0.000492736	0	0	0	0	0	0	0	0	0	0	0	51	M	-	-	-	-	-	-	-	-
	HC_19	-37.6121	2.04905	0.000319011	0	0	0	1	0	0	0	0	1	0	0	41	M	-	-	-	-	-	-	-	-
	HC_20	-36.272	1.9509	-0.000388859	0	0	0	1	0	0	0	1	1	1	0	51	M	-	-	-	-	-	-	-	-
	HC_21	-40.1653	1.97558	5.35124e-05	0	0	0	0	0	0	0	0	1	0	0	55	M	-	-	-	-	-	-	-	-
	HC_22	-31.3136	4.07416	-0.00123639	1	1	0	1	1	0	0	0	1	1	0	58	M	-	-	-	-	-	-	-	-
	HC_23	-42.3491	2.22153	0.000356247	0	0	0	1	0	0	0	0	0	1	0	57	F	-	-	-	-	-	-	-	-
	HC_24	-40.4569	1.7676	0.000621714	0	0	0	0	0	0	0	0	1	0	1	50	F	-	-	-	-	-	-	-	-
	HC_25	-28.5882	4.9918	0.00117256	0	0	0	0	0	0	0	2	1	0	0	54	M	-	-	-	-	-	-	-	-
	HC_26	-38.5891	2.73175	0.00272384	0	0	0	1	0	0	0	1	1	1	0	75	M	-	-	-	-	-	-	-	-
	HC_27	-38.6147	1.58084	-0.000673456	0	0	0	0	0	0	0	0	0	0	0	63	F	-	-	-	-	-	-	-	-
	HC_28	-42.8468	2.93204	0.00430889	0	0	0	1	0	0	0	1	0	0	0	71	F	-	-	-	-	-	-	-	-
	HC_29	-37.8088	1.72849	0.000185517	1	1	1	1	1	1	0	1	0	1	1	72	F	-	-	-	-	-	-	-	-
	HC_30	-43.5931	2.21297	-0.000423774	0	0	0	0	0	0	0	1	0	0	0	72	M	-	-	-	-	-	-	-	-
	HC_31	-34.622	1.66456	-0.00138337	0	0	0	0	1	0	0	0	2	2	0	64	F	-	-	-	-	-	-	-	-
	HC_32	-39.6728	1.31037	6.67047e-05	0	0	0	0	0	0	1	1	1	0	0	75	M	-	-	-	-	-	-	-	-
	HC_33	-33.2052	1.34041	0.000799513	0	0	0	0	1	0	0	0	0	1	0	66	F	-	-	-	-	-	-	-	-
	HC_34	-35.9485	1.53118	0.000296736	1	0	1	1	1	0	1	1	1	1	1	74	M	-	-	-	-	-	-	-	-
	HC_35	-37.5978	1.74979	0.000718142	1	1	1	1	0	0	2	1	1	0	1	65	M	-	-	-	-	-	-	-	-
	HC_36	-41.0206	3.15859	-0.000440993	1	1	0	1	1	0	0	0	2	1	0	66	F	-	-	-	-	-	-	-	-
	HC_37	-40.0073	2.10046	-0.00132593	0	0	1	0	0	0	0	1	1	0	0	70	M	-	-	-	-	-	-	-	-
